# Supplementary material for: Tuning the sensitivity towards mercury via cooperative binding to d-fructose: dual fluorescent chemosensor based on 1,8-naphthyridine-boronic acid derivative
Source: Royal Society of Chemistry journal article supplement (doi:10.1039/d1ra02122b), 2021-01-01
Supplement: d1ra02122b1.pdf [file d1ra02122b1.pdf]

## Appendix A. Supplementary data

### Tuning the Sensitivity towards Mercury via Cooperative Binding to D-Fructose: Dual Fluorescent Chemosensor Based on 1,8-Naphthyridin-boronic Acid Derivative

E. Ramanjaneya Reddy and Marina Rajadurai\*.

*Dr. Reddy's Institute of Life Sciences, University of Hyderabad Campus, Gachibowli, Hyderabad 500046, Telangana, India.*

#### Buffers and Samples Preparation for Fluorescence Studies

##### 1. Buffer Preparation for Fluorescence Studies:

Fluorescence studies were performed using aqueous methanolic buffer (pH 8.20), which was prepared according to Perrin and Dempsey protocol:<sup>1</sup> 8 g of NaCl, 0.2 g of KCl, 1.44 g of Na<sub>2</sub>HPO<sub>4</sub>, 0.24 g of KH<sub>2</sub>PO<sub>4</sub> were dissolved in 800 mL of distilled water and adjust pH by adding a solution of 5 M NaOH and finally make a total volume of 1 L with additional distilled water.

##### 2. Sample Preparation for Fluorescence Binding Studies with Metal Ions:

A known amount of various metal ions (Hg<sup>2+</sup>, Cu<sup>+</sup>, Ag<sup>+</sup>, Mg<sup>2+</sup>, Pb<sup>2+</sup>, Cd<sup>2+</sup>, Hg<sup>2+</sup>, Li<sup>+</sup> and Fe<sup>+3</sup>) was added from 4.86×10<sup>-4</sup> M stock solution to a solution of compound **1.1** (30 μL of 10<sup>-3</sup> M). The volume of the prepared solution was adjusted to 3mL with buffer to achieve final concentration 10 μM in respect to compound **1.1**. The fluorescence measurements were made for each solution.

##### 3. Stoichiometry Determination Using Jobs Plot:

In Job method, solutions of Hg<sup>2+</sup> and **1.1** with equal concentrations were prepared in MeOH/H<sub>2</sub>O (v/v=1:1, 5 mM, pH 7.50), and mixed in different proportions maintaining a total volume of 3 mL and total concentration of 10 μM of the mixture. Then emission of these solutions was recorded, and a graph of the emission intensity (fixed at 408 nm) versus a mole fraction of compound **1.1** was plotted. The stoichiometry of the complex was determined by the point of the maximum emission intensity.

##### 4. Sample Preparation for Fluorescence Binding Studies with D-Mono Saccharides:

A known amount of D-monosaccharides (D-glucose, D-galactose, D-mannose and D-fructose) was added from 0.3 M stock solution to a solution of compound **1.1** (30 μL of 10<sup>-3</sup> M). The volume of the prepared solution was adjusted to 3mL with buffer to achieve final concentration 10 μM in respect to compound **1.1**. The fluorescence measurements were made for each solution and I/I<sub>0</sub> was plotted at 409, 410, 408 and 403 nm respectively.

##### 5. Sample Preparation for Fluorescence Binding Studies of D-Fructose at Various pH Solutions:

A known amount of D-fructose was added from 0.3 M stock solution to a solution of compound **1.1** (30 μL of 10<sup>-3</sup> M). The volume of the prepared solution was adjusted to 3mL with buffer (pH 2, 3, 4, 5, 7.5, 9, 10, 11, 12 respectively) to achieve final concentration 10 μM in respect to compound **1.1**. The fluorescence measurements were made for each solution and I/I<sub>0</sub> was plotted at 403 nm.

##### 6. Sample Preparation for Competitive Binding Studies of D-Monosaccharides and Hg<sup>2+</sup>:

A known amount of D-monosaccharides (from 0.3 M stock solution),  $\text{Hg}^{2+}$  (from  $4.86 \times 10^{-4}$  M stock solution) and 30  $\mu\text{L}$  of a  $10^{-3}$  M of compound **1.1** was placed in 3mL buffer to give a final concentration of 10  $\mu\text{M}$ . The fluorescence measurements were made for each solution.

### Synthesis of the intermediates via Routes II-IV

#### Route-II; Scheme 3a:

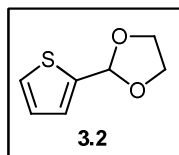

#### 2-(Thiophen-2-yl)-1,3-dioxolane (**3.2**):<sup>2</sup>

Thiophene-2-carbaldehyde **3.1** (1.35 g, 12.05 mmol), ethylene glycol (2.68 mL, 48.2 mmol) and p-toluenesulfonic acid (0.01 g, 0.06 mmol) were dissolved in toluene (60 mL) in one neck round bottom flask. A Dean Stark apparatus was fitted and the reaction mixture was heated at 160 °C for 16 h. The reaction mixture cooled to room temperature and washed with 10% NaOH solution and extracted with DCM. The organic phase was dried with anhydrous sodium sulphate, filtered and solvent was evaporated to provide compound **3.2** as brown oil (1.64 g, 88%) which was used without further purification. Spectroscopic data matches with the one from reported procedure. <sup>1</sup>H NMR ( $\text{CDCl}_3$ , 400 MHz)  $\delta$ : 7.33 (1H, d,  $J = 3.2$  Hz), 7.17 (1H, d,  $J = 3.2$  Hz), 7.01 (1H, m), 6.13 (1H, s), 4.11 (2H, m), 4.01 (2H, m).

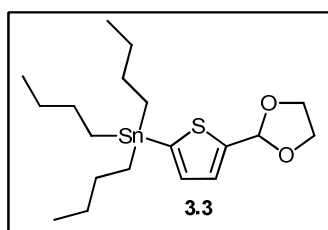

#### (5-(1,3-Dioxolan-2-yl)thiophen-2-yl)tributylstannane (**3.3**):<sup>3</sup>

To a solution of compound **3.2** (0.9, 5.76 mmol) in dry THF (30 mL) was added n-butyl lithium (1.6 M in hexane, 7.25 mL, 11.6 mmol) at -78 °C. After 1 h at -78 °C, tributyl tin chloride (2.81 mL, 8.64 mmol) was added drop wise to the above reaction mixture. After stirring for 24 h at room temperature, the mixture was quenched with 20 mL of saturated aqueous ammonium chloride solution and extracted with hexane. The organic phase was dried with anhydrous sodium sulphate, concentrated under reduced pressure, and the resulting residue **3.3** was used without further purification (1.08 g, 43%). Spectroscopic data matches with the one from reported procedure. <sup>1</sup>H NMR ( $\text{CDCl}_3$ , 400 MHz)  $\delta$ : 7.27 (1H, d,  $J = 3.2$  Hz), 7.04 (1H, d,  $J = 3.2$  Hz), 6.15 (1H, s), 4.16 (2H, m), 4.02 (2H, m), 1.56 (6H, m), 1.32 (6H, m), 1.09 (6H, m), 0.91 (9H, m).

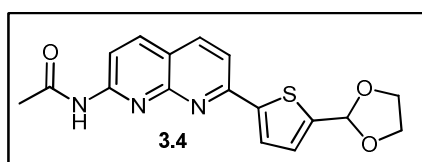

**N-(7-(5-(1,3-Dioxolan-2-yl)thiophen-2-yl)-1,8-naphthyridin-2-yl)acetamide (3.4):**

Compound **3.3** (5.32 g, 12 mmol), compound **1.4** (2.0 g, 9 mmol) and PdCl<sub>2</sub>(PPh<sub>3</sub>)<sub>2</sub> (0.630 g, 0.9 mmol) were taken in a two necked round bottom flask, degassed with nitrogen and dry 1,4-dioxane (100 mL) under nitrogen atmosphere was added. The reaction mixture was refluxed for 3 h, after that the solvent was removed under reduced pressure, and then the crude residue was dissolved in EtOAc, passed through celite and the solvent was evaporated. The crude residue was purified by column chromatography using 1:1 EtOAc:hexane to give pure compound **3.4** as a yellowish solid (2.0 g, 65%). Mp: 180-190 °C. TLC (50% EtOAc in Hexane): R<sub>f</sub> = 0.26. <sup>1</sup>H NMR (DMSO-*d*<sub>6</sub>, 400 MHz) δ: 11.11 (1H, s), 8.37-8.29 (3H, m), 8.04 (1H, d, *J* = 8.4 Hz), 7.91 (1H, d, *J* = 3.6 Hz), 7.27-7.26 (1H, m), 6.00 (1H, s), 4.08-4.04 (2H, m), 3.97-3.92 (2H, m), 2.15 (3H, s). <sup>13</sup>C NMR (CDCl<sub>3</sub>, 100 MHz) δ: 170.3, 155.1, 154.5, 154.2, 146.1, 144.8, 139.0, 137.0, 132.0, 131.9, 128.4, 128.3, 126.9, 126.4, 119.3, 116.8, 115.0, 24.8. MS (EI, 70eV): *m/z* [M]<sup>+</sup> calcd for C<sub>17</sub>H<sub>15</sub>N<sub>3</sub>O<sub>3</sub>S: 341.0, found 342.0 [M+1]<sup>+</sup>. Anal. Calcd for C<sub>17</sub>H<sub>15</sub>N<sub>3</sub>O<sub>3</sub>S: C, 59.81; H, 4.43; N, 12.31; O, 14.06; S, 9.39, found: C, 59.73; H, 4.41; N, 12.29.

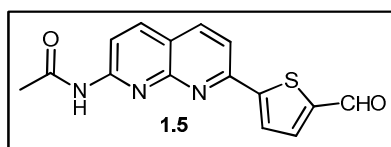**N-(7-(5-Formylthiophen-2-yl)-1,8-naphthyridin-2-yl)acetamide (1.5):**

1M HCl (2 mL) was added dropwise to a solution of compound **3.4** (0.16 g, 0.46 mmol) in dry acetone (30 mL). After complete addition of HCl the reaction mixture was stirred at room temperature for 6 h, then the solvent was removed under reduced pressure and crude residue was extracted with EtOAc. The organic phase was dried with anhydrous sodium sulphate, concentrated under reduced pressure, and the resulting residue **1.5** was used without further purification (0.1 g, 73%). Mp: 270-274 °C. TLC (50% EtOAc in hexane): R<sub>f</sub> = 0.24; <sup>1</sup>H NMR (DMSO-*d*<sub>6</sub>, 400 MHz) δ: 11.20 (1H, s), 9.98 (1H, s), 8.50-8.36 (3H, m), 8.22-8.20 (2H, m), 8.12 (1H, d, *J* = 3.6 Hz), 2.18 (3H, s). <sup>13</sup>C NMR (DMSO-*d*<sub>6</sub>, 100 MHz) δ: 185.2, 170.6, 155.4, 154.6, 153.8, 153.3, 145.2, 139.7, 139.2, 138.8, 128.7, 120.3, 117.5, 115.4, 24.5. MS (EI, 70eV): *m/z* [M]<sup>+</sup> calcd for C<sub>15</sub>H<sub>11</sub>N<sub>3</sub>O<sub>3</sub>S: 297.0, found 298.1 [M+1]<sup>+</sup>. Anal. Calcd for C<sub>15</sub>H<sub>11</sub>N<sub>3</sub>O<sub>3</sub>S: C, 60.59; H, 3.73; N, 14.13; O, 10.76; S, 10.78, found: C, 60.45; H, 3.68; N, 14.06.

**Route-II; Scheme 3b:**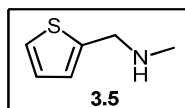**N-Methyl-1-(thiophen-2-yl)methanamine (3.5):**<sup>4</sup>

Thiophene-2-carboxaldehyde **3.1** (0.54 g, 4 mmol) and 40% aqueous methyl amine (0.74 g, 20 mmol) were dissolved in MeOH (20 mL). After 1 h, sodium borohydride was added portion wise at 0 °C to the reaction mixture. The resulting mixture was stirred at room temperature for 3-4 days. The crude residue was taken up in 200 mL water and extracted with DCM. The organic phase was dried with anhydrous sodium sulphate, concentrated under reduced pressure, and the resulting residue was subjected to column chromatography using 70% EtOAc in hexane to give compound **3.5** (0.30g, 60%).

Spectroscopic data matches with the one from reported procedure.  $^1\text{H}$  NMR ( $\text{CDCl}_3$ , 400 MHz)  $\delta$ : 7.17 (1H, m), 6.91 (2H, m), 3.90 (2H, s), 2.43 (3H, s), 2.18 (1H, s).

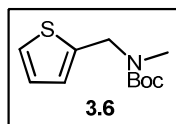

#### Tert-butyl methyl(thiophen-2-ylmethyl)carbamate (3.6):<sup>5</sup>

Compound **3.5** (0.2 g, 1.57 mmol) and sodium bicarbonate (0.25 g, 3.14 mmol) were dissolved in dry THF.  $\text{Boc}_2\text{O}$  (0.68 g, 3.14 mmol) was added dropwise to the reaction mixture. The resulting mixture was stirred at room temperature for 3 h. The crude residue was taken up in 100 mL water and extracted with EtOAc. The organic phase was dried with anhydrous sodium sulphate, concentrated under reduced pressure, and the resulting residue was subjected to column chromatography using 10% EtOAc in hexane to give compound **3.6** which was used without further purification (0.34g, 97%). Spectroscopic data matches with the one from reported procedure.  $^1\text{H}$  NMR ( $\text{CDCl}_3$ , 400 MHz)  $\delta$ : 7.22 (1H, m), 6.94 (2H, m), 4.54 (2H, s), 2.85 (3H, s), 1.52 (9H, s).

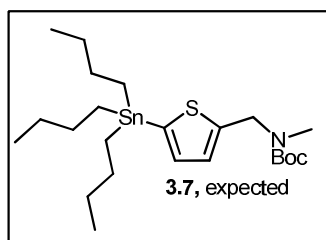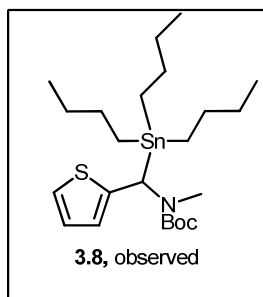

#### Tert-butyl methyl((5-(tributylstannyl)thiophen-2-yl)methyl)carbamate (3.7):<sup>6</sup>

n-Butyl lithium (1.6 M in hexane, 2.4 mL, 3.85 mmol) was added to a solution of compound **3.6** (0.4 g, 1.76 mmol) in dry THF (30 mL) at 0 °C. After 1 h at 0 °C, tributyl tin chloride (1.26 g, 3.88 mmol) was added to the above reaction mixture. After stirring for 12 h at room temperature, the reaction mixture was quenched with 20 mL of saturated aqueous ammonium chloride solution and extracted with hexane. The organic phase was dried with anhydrous sodium sulphate, concentrated under reduced pressure. Spectroscopic data matches to compound **3.8** (0.58 g, 64%) instead of **3.7**.  $^1\text{H}$  NMR ( $\text{CDCl}_3$ , 400 MHz)  $\delta$ : 6.99 (1H, d,  $J = 4.8$  Hz), 6.87 (1H, dd,  $J = 4.8, 3.6$  Hz), 6.59 (1H, d,  $J = 3.2$  Hz), 3.96 (1H, s), 2.91 (3H, s), 1.47 (9H, s), 1.41-1.22 (12H, m), 0.94-0.84 (15H, m).

#### Route-III; Scheme 4:

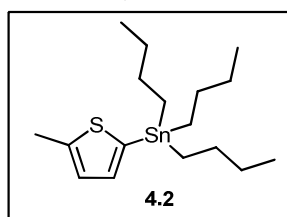

Tributyl(5-methylthiophen-2-yl)stannane (4.2): [ENREF 22](#)<sup>6</sup>

n-Butyl lithium (1.6 M in hexane, 3.81 mL, 6.11 mmol) was added to a solution of compound **4.1** (0.5 g, 5.09 mmol) in dry THF (30 mL) at 0 °C. After 1 h at 0 °C, tributyl tin chloride (1.65 mL, 6.11 mmol) was added drop wise to the above reaction mixture. After stirring over 12 h at room temperature, the reaction mixture was quenched with 20 mL of saturated aqueous ammonium chloride solution and extracted with hexane. The organic phase was dried with anhydrous sodium sulphate, concentrated under reduced pressure, and the resulting residue **4.2** was used without further purification (1.26 g, 64%). Spectroscopic data matches the one from reported procedure. <sup>1</sup>H NMR (CDCl<sub>3</sub>, 400 MHz) δ: 6.96 (1H, d, *J* = 3.2 Hz), 6.88 (1H, dd, *J* = 5.2, 3.2 Hz), 2.54 (3H, s), 1.56 (6H, m), 1.33 (6H, m), 1.07 (6H, m), 0.89 (9H, m).

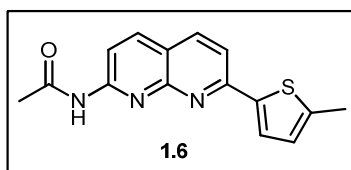

**N-(7-(5-Methylthiophen-2-yl)-1,8-naphthyridin-2-yl)acetamide (1.6):**

Compound **4.2** (2.40 g, 6 mmol), compound **1.4** (1.0 g, 4.5 mmol) and PdCl<sub>2</sub>(PPh<sub>3</sub>)<sub>2</sub> (0.149 g, 0.22 mmol) were taken in a two necked round bottom flask, degassed with nitrogen and 1,4-dioxane (50 mL) was added under nitrogen atmosphere. The reaction mixture was refluxed for 2 h, the solvent was removed under reduced pressure, and the crude residue was dissolved in EtOAc, passed through celite and the solvent was evaporated. The crude residue was purified by column chromatography using 1:1 EtOAc:hexane to give compound **1.6** as a yellowish solid (1.1 g, 65%). Mp: 150-152 °C. TLC (50% EtOAc in hexane): R<sub>f</sub> = 0.28. <sup>1</sup>H NMR (CDCl<sub>3</sub>, 400 MHz) δ: 8.44 (1H, d, *J* = 8.4 Hz), 8.16 (1H, d, *J* = 8.8 Hz), 8.08 (1H, d, *J* = 8.4 Hz), 7.75 (1H, d, *J* = 8.4 Hz), 7.66 (1H, d, *J* = 3.6 Hz), 6.84 (1H, m), 2.57 (3H, s), 2.33 (3H, s). <sup>13</sup>C NMR (CDCl<sub>3</sub>, 100 MHz) δ: 170.5, 156.1, 153.7, 145.83, 145.82, 141.5, 139.9, 136.9, 127.8, 126.8, 118.9, 117.3, 114.1, 24.9, 15.8. MS (EI, 70eV): *m/z* [M]<sup>+</sup> calcd for C<sub>15</sub>H<sub>13</sub>N<sub>3</sub>OS: 283.0, found 284.1 [M+1]<sup>+</sup>. Anal. Calcd for C<sub>15</sub>H<sub>13</sub>N<sub>3</sub>OS: C, 63.58; H, 4.62; N, 14.83; O, 5.65; S, 11.32, found: C, 63.53; H, 4.63; N, 14.85.

**Route-IV; Scheme 5:**

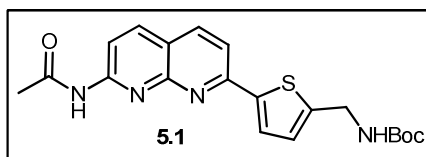

**Tert-butyl ((5-(7-acetamido-1,8-naphthyridin-2-yl)thiophen-2-yl)methyl)carbamate 5.1:**

Compound **1.4** (1.0 g, 4.5 mmol), compound **2.2** (3.0 g, 6 mmol) and PdCl<sub>2</sub>(PPh<sub>3</sub>)<sub>2</sub> (0.157 g, 0.22 mmol) were taken in a two necked round bottom flask, degassed with nitrogen and dry 1,4-dioxane (100 mL) was added under nitrogen atmosphere. The reaction mixture was refluxed for 1 h, the solvent was removed under reduced pressure, and the crude residue was dissolved in EtOAc, passed through celite and the solvent was evaporated. The crude compound was purified by column chromatography using 60% EtOAc in hexane to give compound **5.1** as a yellowish solid (1.5 g, 84%). Mp: 198-200 °C. TLC (60% EtOAc in hexane): R<sub>f</sub> = 0.24. <sup>1</sup>H NMR (DMSO-*d*<sub>6</sub>, 400 MHz) δ: 11.09 (1H, s), 8.33 (3H, m), 8.01

(1H, d,  $J = 8.4$  Hz), 7.85 (1H, d,  $J = 3.2$  Hz), 7.59-7.55 (1H, m), 7.01 (1H, d,  $J = 3.2$  Hz), 4.31 (2H, d,  $J = 5.6$  Hz), 2.16 (3H, s).  $^{13}\text{C}$  NMR (DMSO- $d_6$ , 100 MHz)  $\delta$ : 170.4, 156.0, 155.2, 155.0, 154.8, 148.8, 143.5, 139.5, 138.0, 127.7, 126.5, 119.2, 116.7, 114.2, 78.5, 44.0, 28.6, 24.5. MS (EI, 70eV):  $m/z$  [ $\text{M}$ ] $^+$  calcd for  $\text{C}_{20}\text{H}_{22}\text{N}_4\text{O}_3\text{S}$ : 398.14, found 398.2 [ $\text{M}+1$ ] $^+$ . Anal. Calcd for  $\text{C}_{20}\text{H}_{22}\text{N}_4\text{O}_3\text{S}$ : C, 60.28; H, 5.56; N, 14.06; O, 12.05; S, 8.05, found: C, 60.15; H, 5.63; N, 14.12.

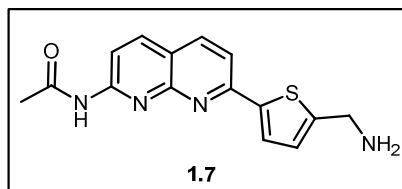

#### **N-(7-(5-(Aminomethyl)thiophen-2-yl)-1,8-naphthyridin-2-yl)acetamide (1.7):**

To a solution of compound **5.1** (0.14 g, 0.35 mmol) in dry DCM (2 mL) trifluoroacetic acid (2 mL) was added at 0 °C. The reaction mixture was slowly heated to room temperature and stirred at room temperature for 4 h. After 4 h, reaction mixture was quenched with saturated sodium bicarbonate solution followed by extraction with DCM. The organic phase was dried with anhydrous sodium sulphate, concentrated under reduced pressure, and the resulting residue **1.7** (0.11 g, 82%) was used without further purification. Mp: 172-174 °C. TLC (20% MeOH in DCM):  $R_f = 0.24$ .  $^1\text{H}$  NMR (DMSO- $d_6$ , 400 MHz)  $\delta$ : 11.10 (1H, s), 8.40-8.33 (3H, m), 8.26 (2H, s), 8.06 (1H, d,  $J = 8.4$  Hz), 7.97 (1H, d,  $J = 3.6$  Hz), 7.30 (1H, d,  $J = 4.0$  Hz), 4.33-4.27 (2H, m), 2.16 (3H, s).  $^{13}\text{C}$  NMR (DMSO- $d_6$ , 100 MHz)  $\delta$ : 170.5, 158.8, 158.5, 155.1, 154.7, 146.0, 139.8, 138.4, 130.6, 127.9, 119.5, 116.8, 114.6, 37.7, 24.6. MS (EI, 70eV):  $m/z$  [ $\text{M}$ ] $^+$  calcd for  $\text{C}_{15}\text{H}_{14}\text{N}_4\text{OS}$ : 298.09, found 299.2 [ $\text{M}$ ] $^+$ . Anal. Calcd for  $\text{C}_{15}\text{H}_{14}\text{N}_4\text{OS}$ : C, 60.38; H, 4.73; N, 18.78; O, 5.36, S, 10.75, found: C, 60.26; H, 4.78; N, 18.65.

### **Discussion of the Routes II-IV**

Our attempt to synthesize key intermediate **1.2** following route **II** is outlined in **Scheme S1**. Commercially available starting material thiophene-2-carbaldehyde **3.1** was protected with ethylene glycol to give compound **3.2** in 88% yield.<sup>2</sup> Later, compound **3.2** was subjected to lithiation using *n*-BuLi followed by treatment with tributyl tin chloride to afford compound **3.3** in good yield. In the next step, compound **3.3** was coupled to compound **1.4** in Stille coupling conditions in THF using palladium (II) catalyst to give compound **3.4** in decent yields. Deprotection of compound **3.4** with 1M HCl led to compound **1.5** in 73% yield.

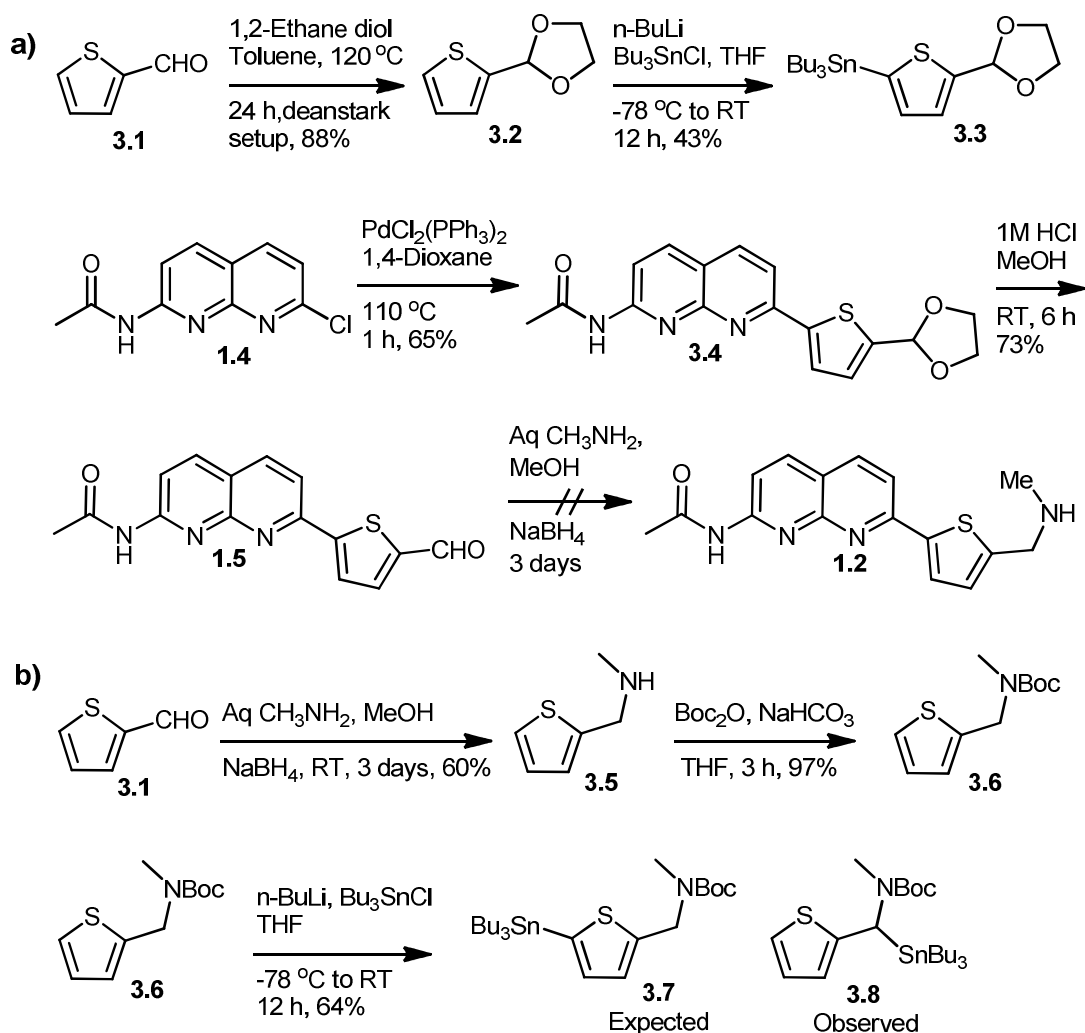

**Scheme S1:** Route II towards key intermediate **1.2**

We expected to obtain key intermediate **1.2** after treatment of compound **1.5** with methyl amine to obtain corresponding imine, followed by reduction using sodium borohydride. Unfortunately, reaction didn't initiate under these conditions and starting materials were recovered as it is. Therefore, we desired to change the synthetic plan as outlined in **Scheme S1b**. In this case, the same starting material thiophene-2-carboxaldehyde **3.1** first was subjected to imine formation using methyl amine followed by reduction with sodium borohydride to afford compound **3.5** in 60% yield. In the next step, Boc protection of compound **3.5** gave compound **3.6** in 97% yield, and finally compound **3.6** was subjected to lithiation using *n*-BuLi followed by treatment with tributyl tin chloride. Unfortunately, instead of **3.7** we obtained unexpected compound **3.8** as a major product. <sup>1</sup>H NMR spectroscopy shows three protons in aromatic region and one proton at 3.96 ppm corresponding to **3.8**.<sup>7</sup>

Another attempt towards key intermediate **1.2** was made as described in route **III** and outlined in **Scheme S2**. The synthesis started from lithiation of methyl thiophene **4.1** with *n*-BuLi, which was further treated with tributyl tin chloride to give compound **4.2** in 64% yield.<sup>6</sup> Subsequently, compound **4.2** was coupled with compound **1.4** in Stille coupling conditions in 1,4-dioxane using palladium (II) catalyst to give compound **4.3** in 83% yield. Next, we were planning partial bromination of compound **4.3** with *N*-bromosuccinimide using free radical initiator

azobisisobutyronitrile (AIBN). However, this reaction did not lead to compound **1.6**, instead we observe a complex mixture of side products and had to abandon this scheme.

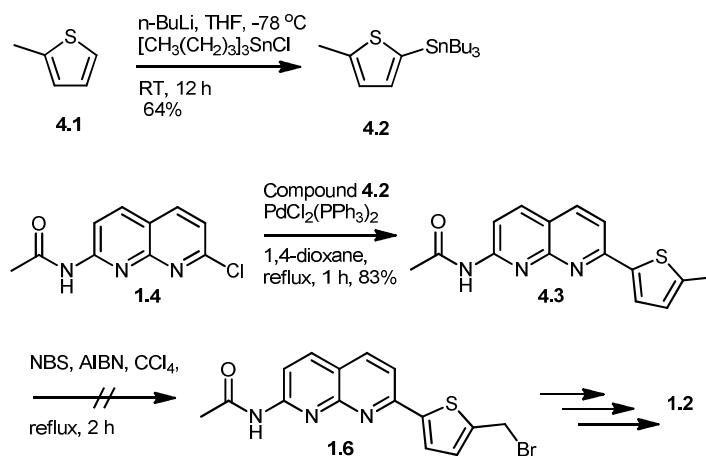

**Scheme S2:** Route III towards key intermediate **1.2**

Yet another attempt towards key intermediate **1.4** is outlined in **Scheme S3**, route IV. We used compounds **2.2** and **1.4** as our starting materials and subjected them to Stille coupling in 1,4-dioxane using palladium (II) catalyst to obtain compound **5.1** in 84% yield. Boc-deprotection of the later using trifluoroacetic acid resulted in compound **1.7** in 82% yield. Further, in order to attain key starting material **1.2**, compound **1.7** was treated with methyl iodide as a methylating agent and potassium carbonate as a base. Although this step was successful, the yield of compound **1.2** was very poor, only 21%. Such low yield is the result of exclusive formation of over-alkylated product. Therefore, this synthetic pathway was not efficient enough and was abandoned as well.

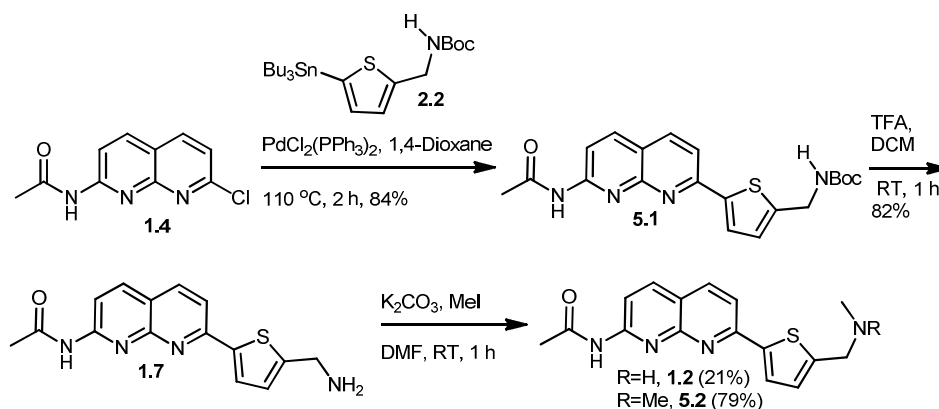

**Scheme S3:** Route IV towards key intermediate **1.2**



## NMR Spectra of Synthesized Compounds.

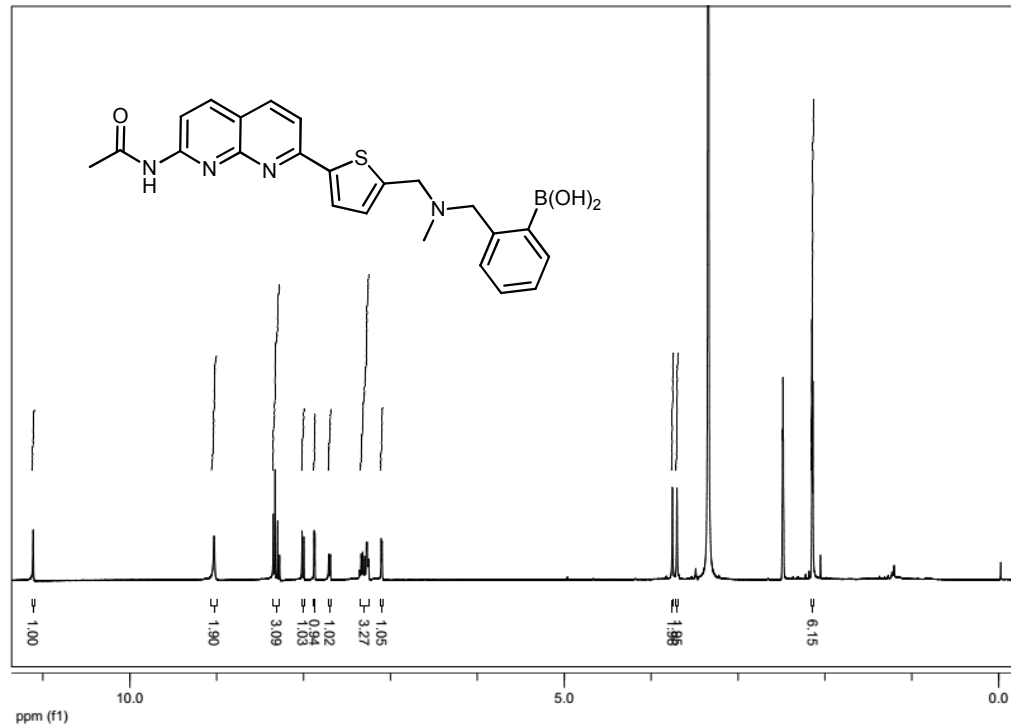

Figure S1: <sup>1</sup>H NMR (DMSO-*d*<sub>6</sub>, 400 MHz) of compound 1.1

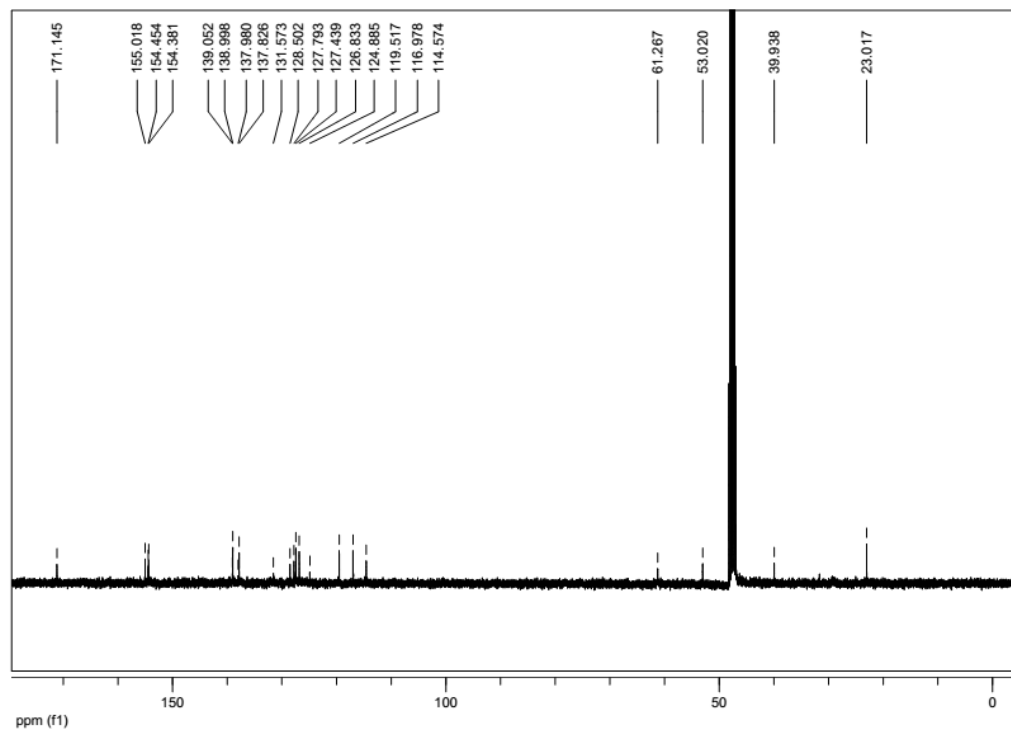

Figure S2: <sup>13</sup>C NMR (CD<sub>3</sub>OD, 100 MHz) of compound 1.1

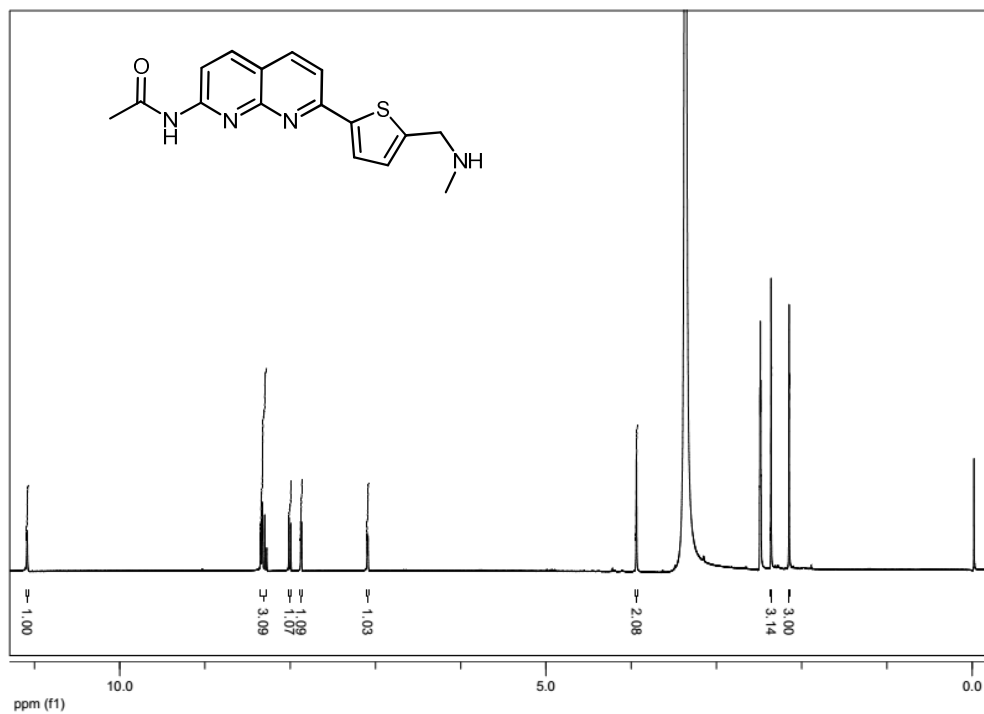

**Figure S3:** <sup>1</sup>H NMR (DMSO-*d*<sub>6</sub>, 400 MHz) of compound 1.2

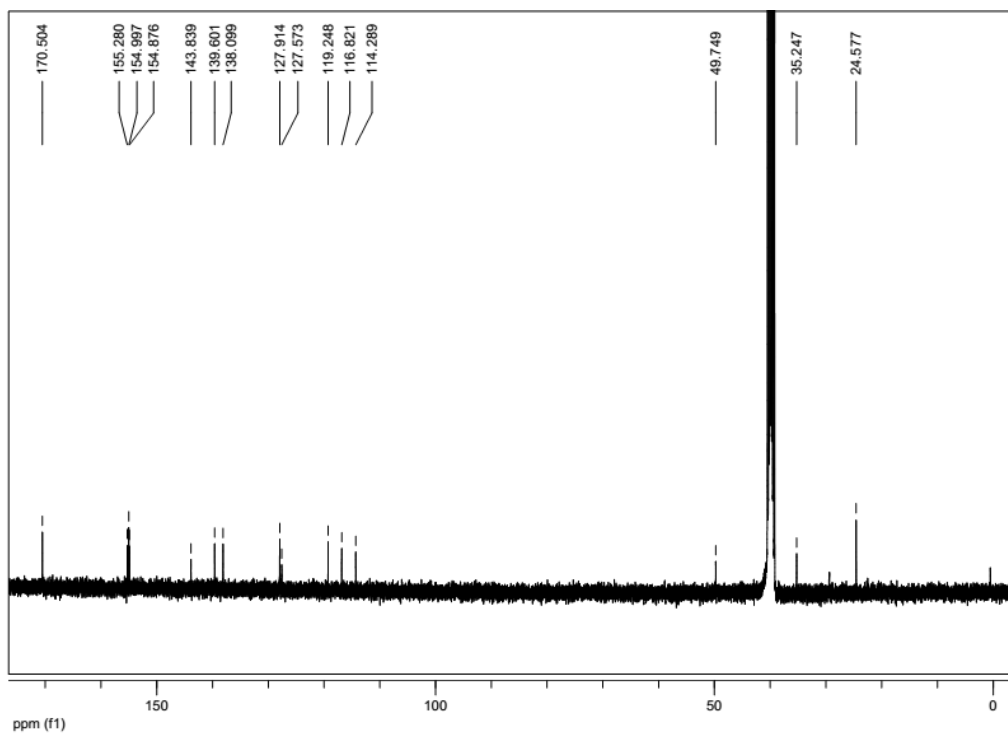

**Figure S4:** <sup>13</sup>C NMR (DMSO-*d*<sub>6</sub>, 100 MHz) of compound 1.2

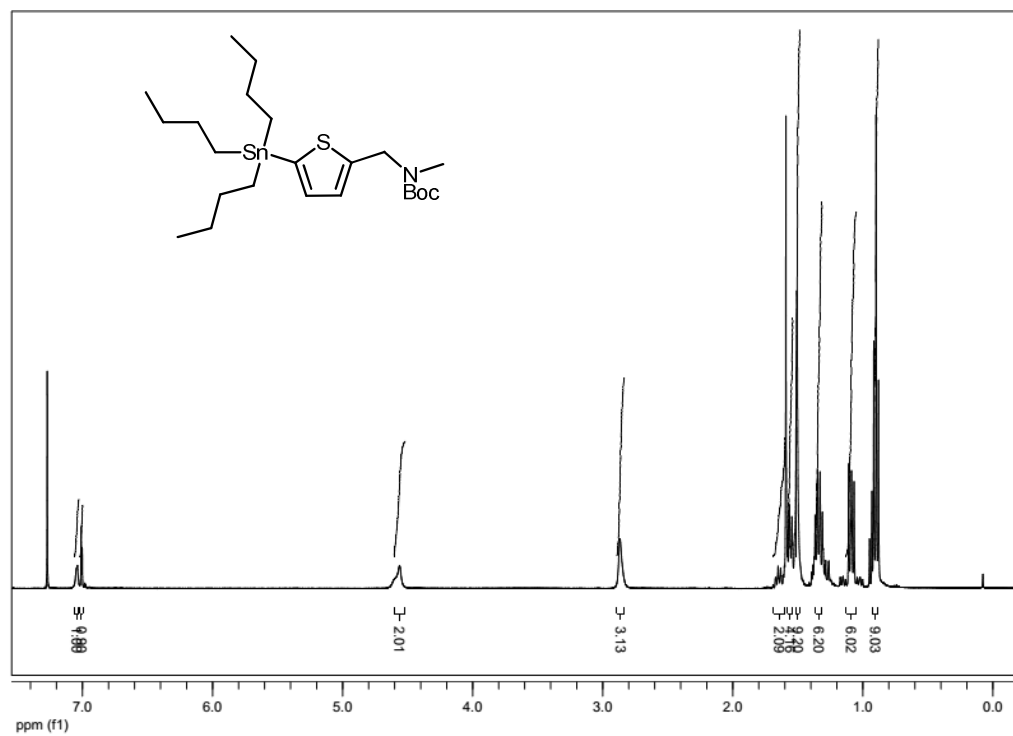

Figure S5: <sup>1</sup>H NMR (CDCl<sub>3</sub>, 400 MHz) of compound 1.3

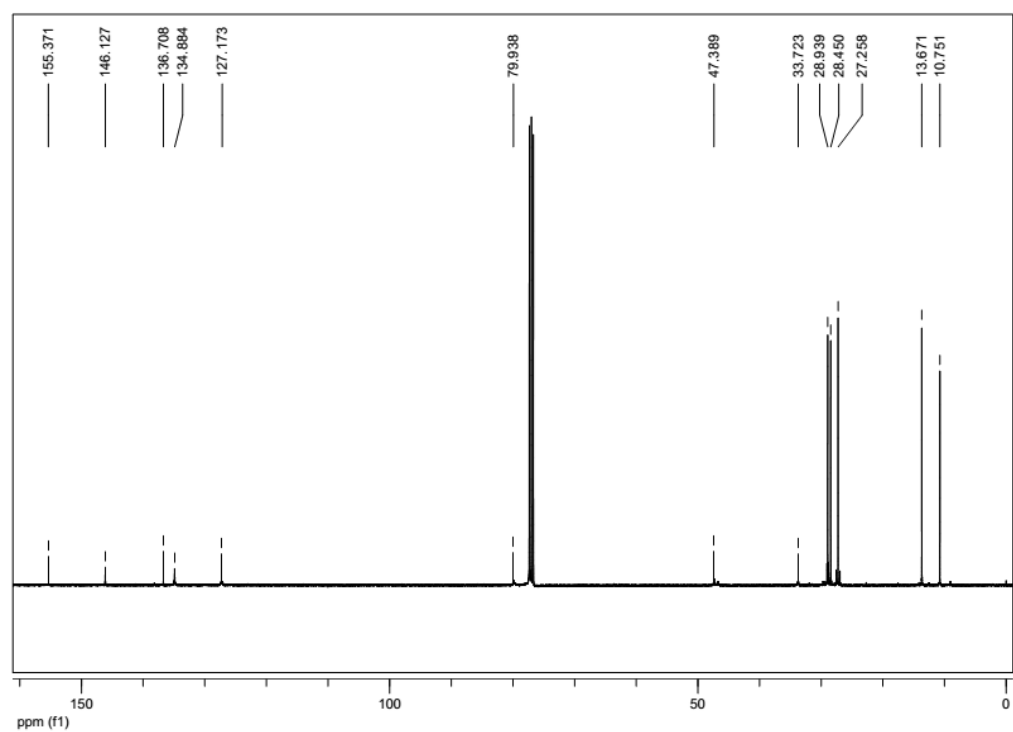

Figure S6: <sup>13</sup>C NMR (CDCl<sub>3</sub>, 100 MHz) of compound 1.3

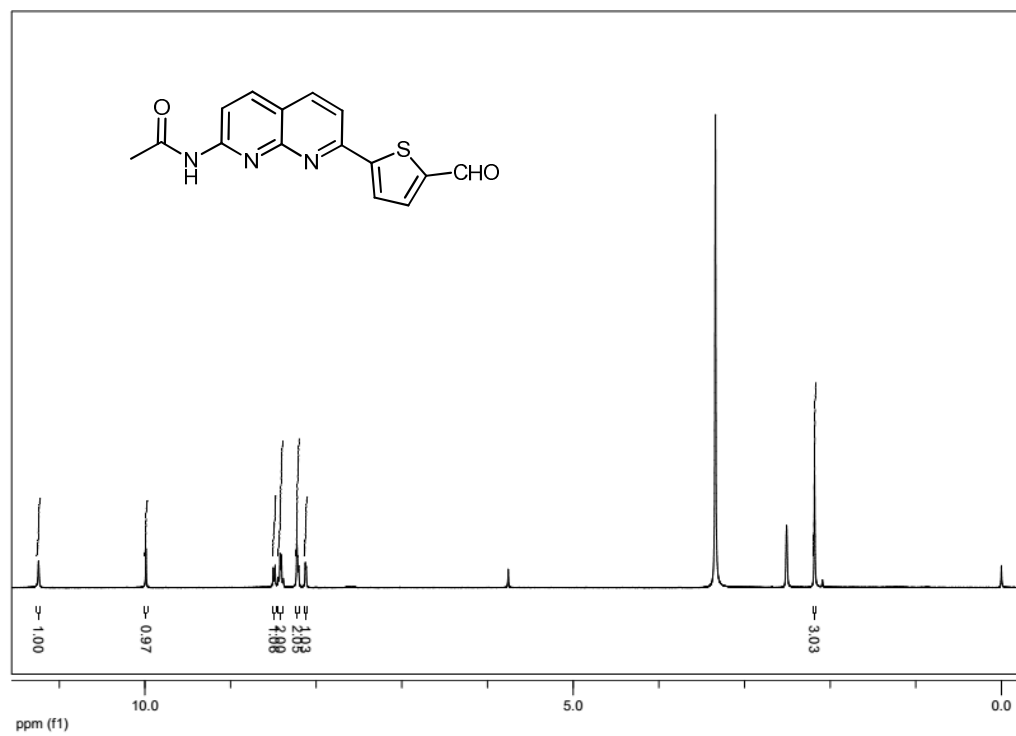

**Figure S7:**  $^1\text{H}$  NMR (DMSO- $d_6$ , 400 MHz) of compound 1.5

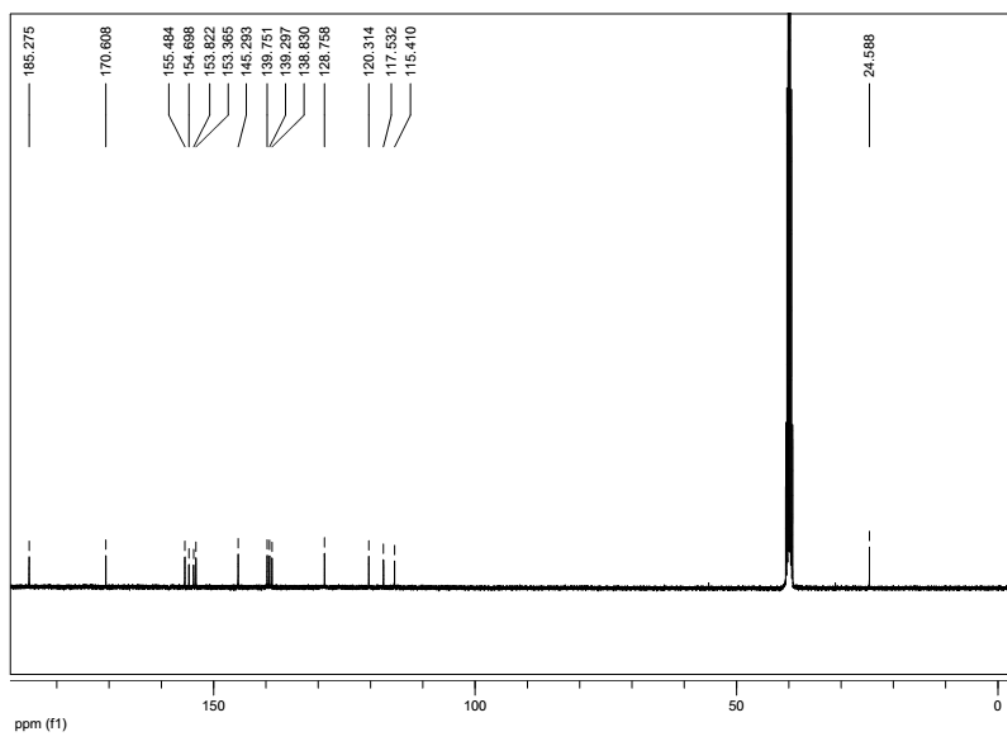

**Figure S8:**  $^{13}\text{C}$  NMR (DMSO- $d_6$ , 100 MHz) of compound 1.5

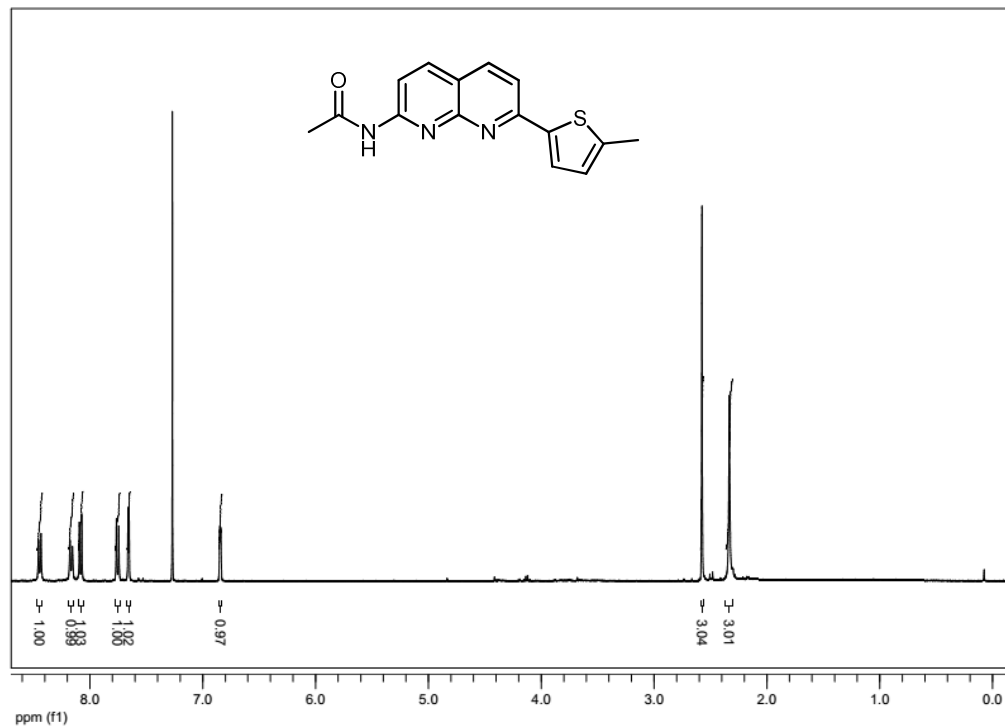

**Figure S9:**  $^1\text{H NMR}$  (CDCl<sub>3</sub>, 400 MHz) of compound 1.6

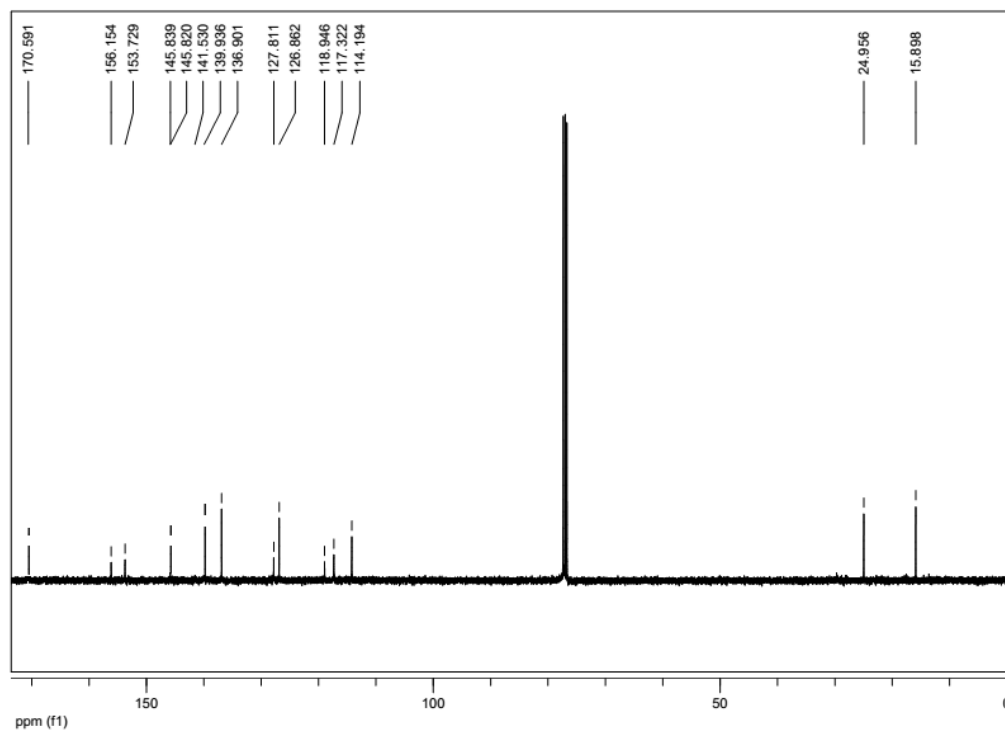

**Figure S10:**  $^{13}\text{C NMR}$  (CDCl<sub>3</sub>, 100 MHz) of compound 1.6

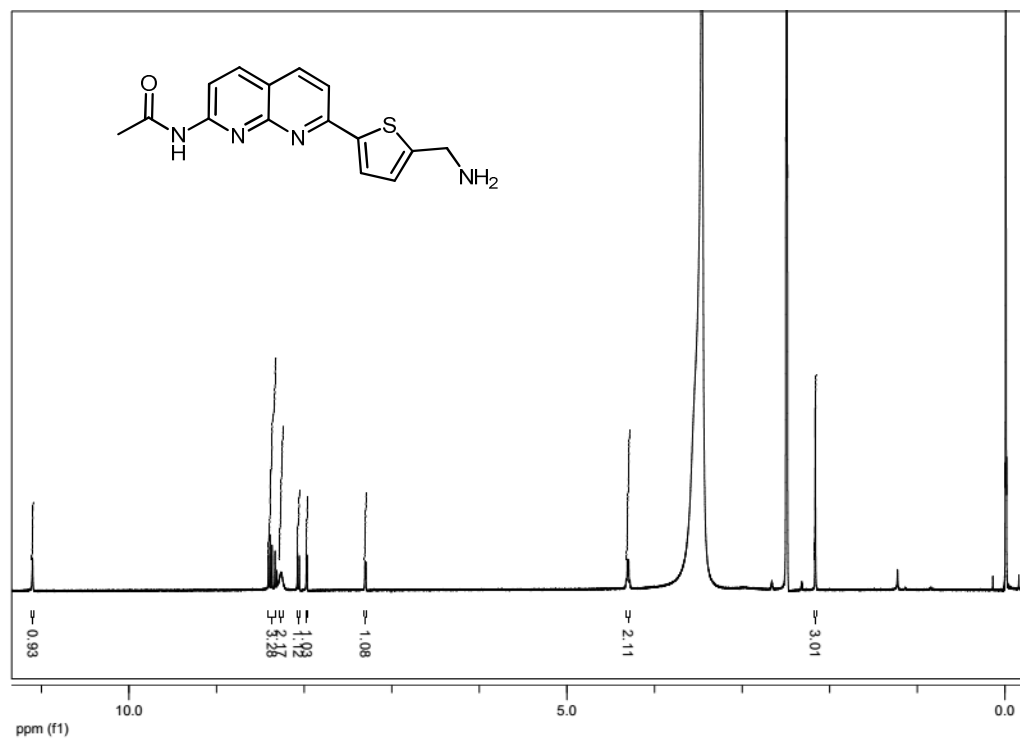

**Figure S11:** <sup>1</sup>H NMR (DMSO-*d*<sub>6</sub>, 400 MHz) of compound 1.7

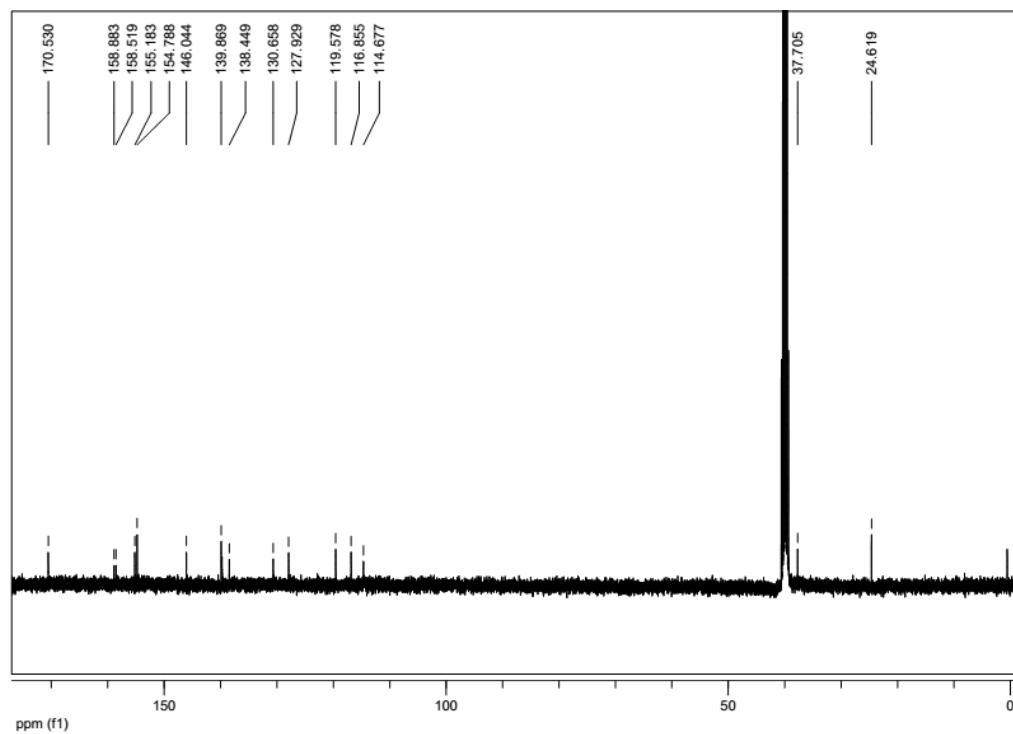

**Figure S12:** <sup>13</sup>C NMR (DMSO-*d*<sub>6</sub>, 100 MHz) of compound 1.7

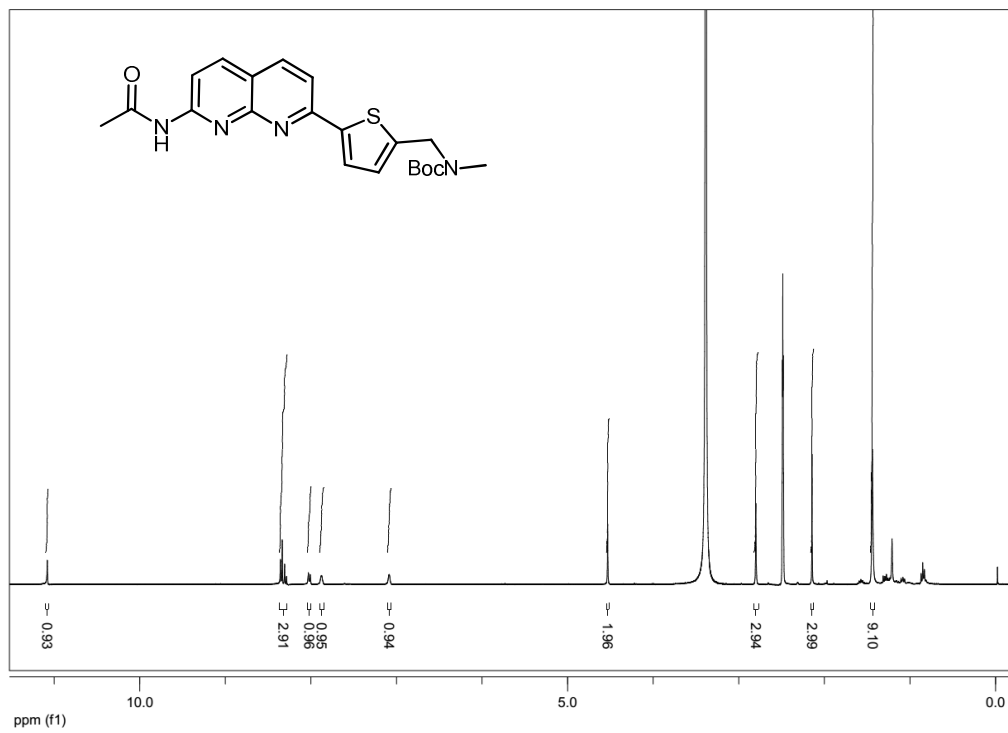

**Figure S13:** <sup>1</sup>H NMR (DMSO-*d*<sub>6</sub>, 400 MHz) of compound 2.6

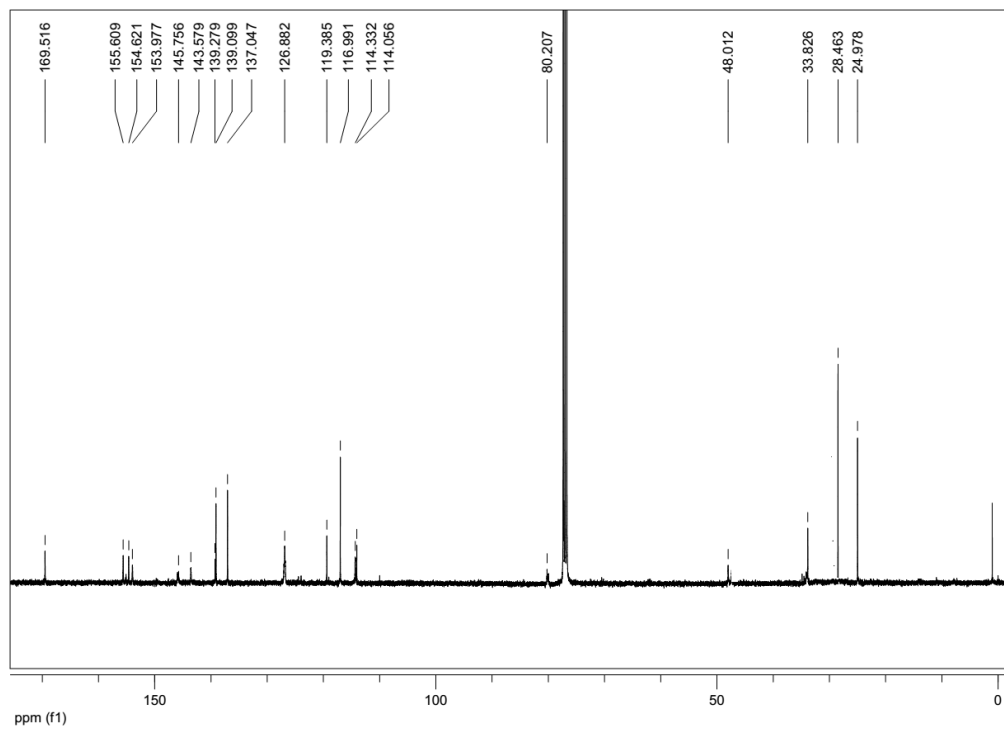

**Figure S14:** <sup>13</sup>C NMR (CDCl<sub>3</sub>, 100 MHz) of compound 2.6

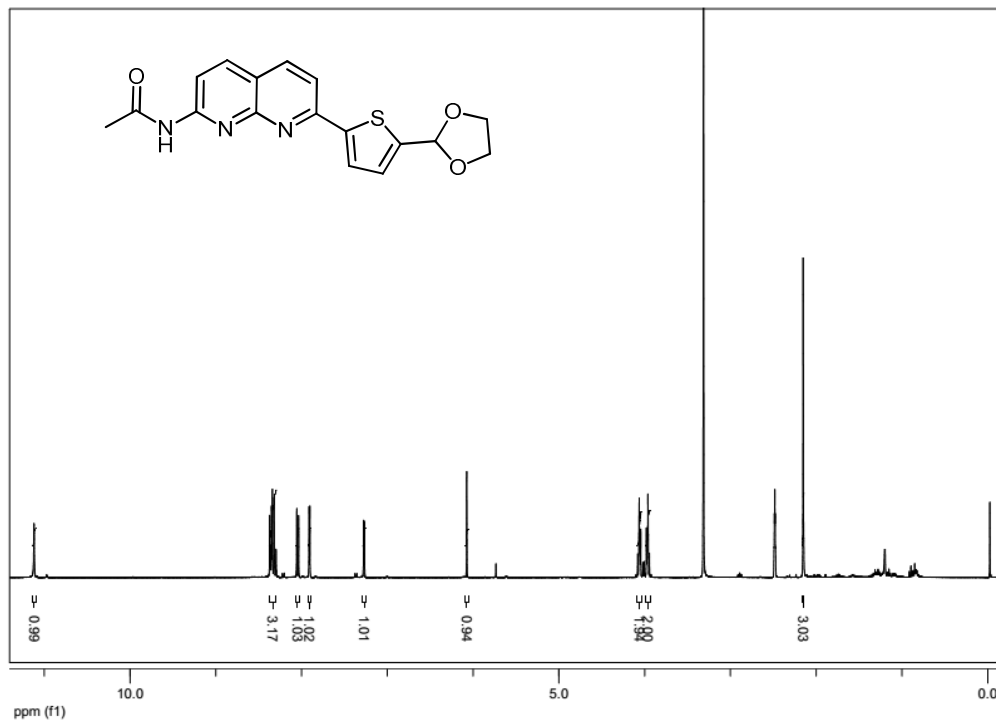

**Figure S15:** <sup>1</sup>H NMR (DMSO-*d*<sub>6</sub>, 400 MHz) of compound 3.4

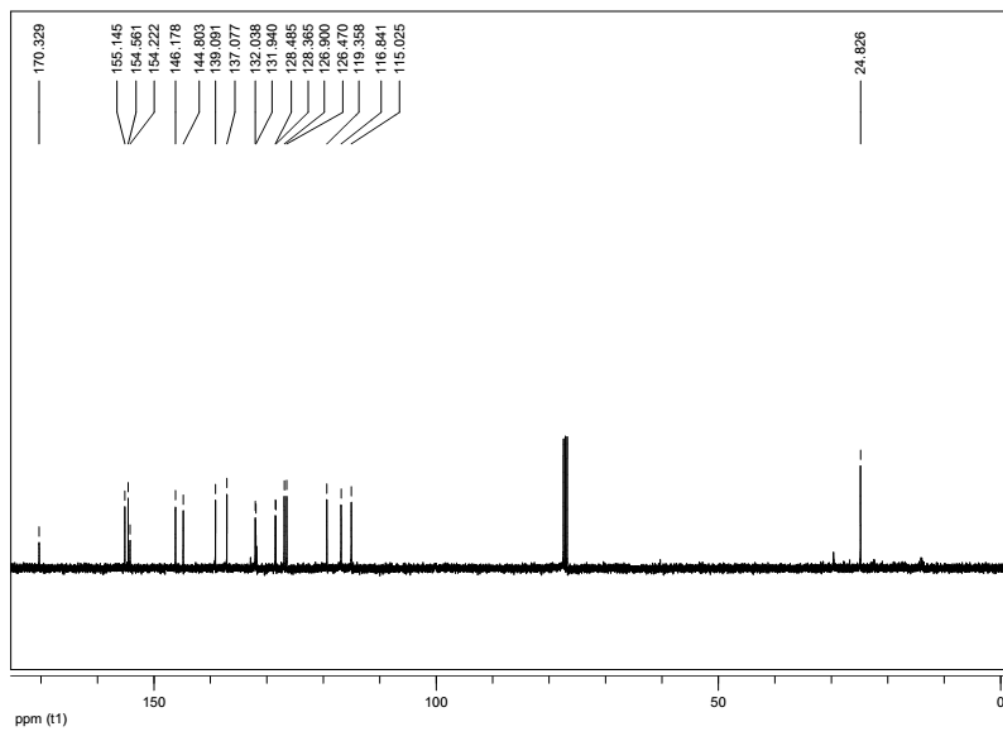

**Figure S16:** <sup>13</sup>C NMR (CDCl<sub>3</sub>, 100 MHz) of compound 3.4



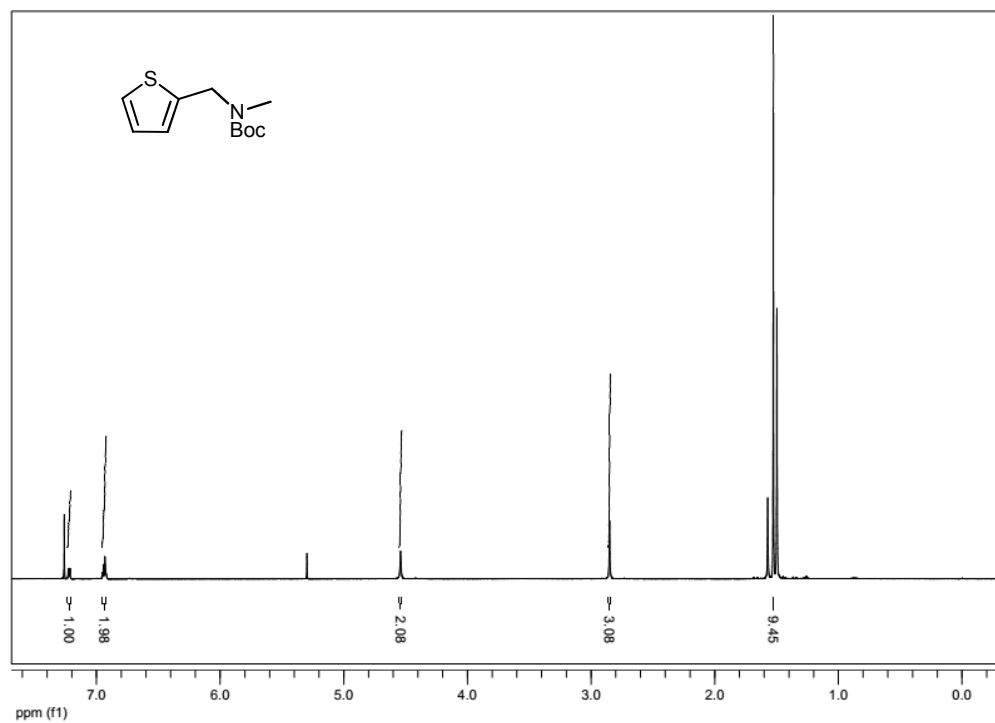

**Figure S17:** <sup>1</sup>H NMR (CDCl<sub>3</sub>, 400 MHz) of compound **3.6**

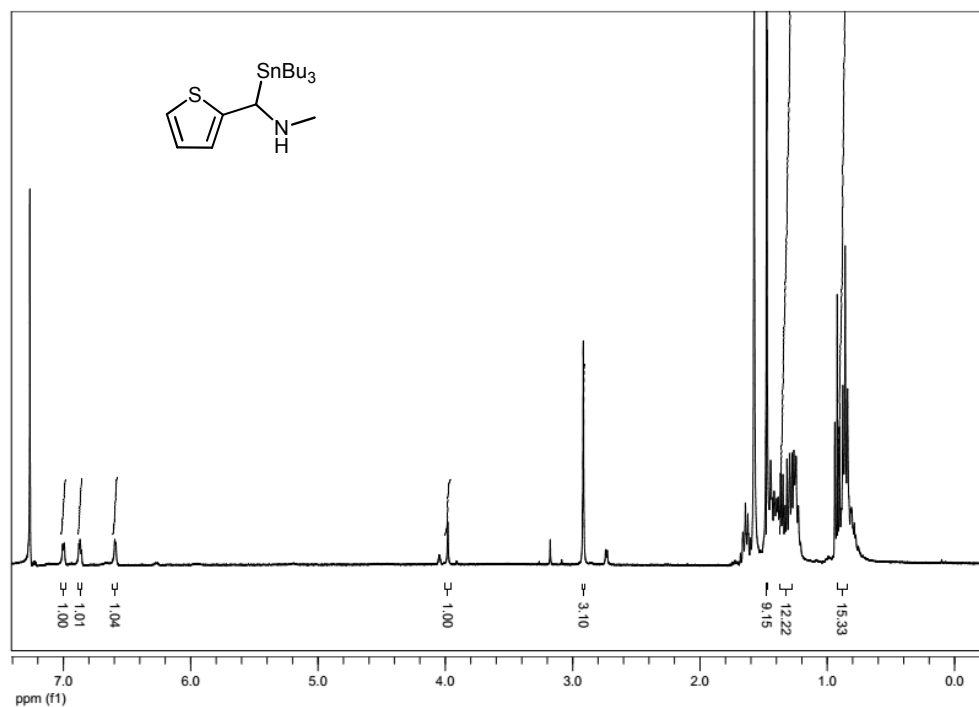

**Figure S18:** <sup>1</sup>H NMR (CDCl<sub>3</sub>, 400 MHz) of compound **3.8**

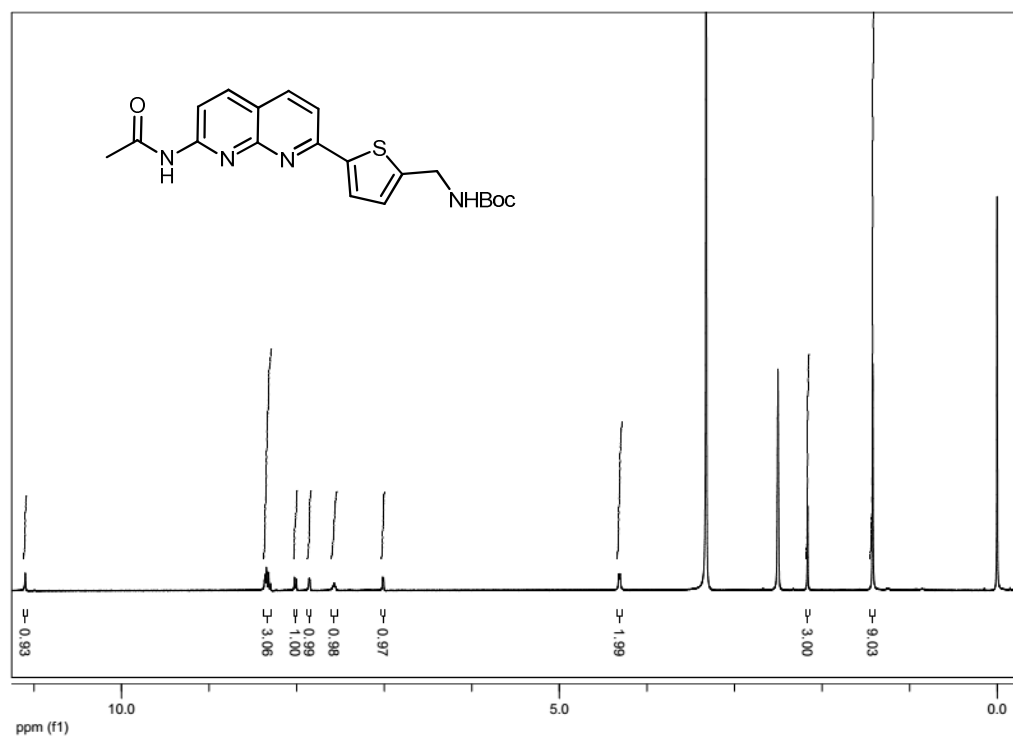

**Figure S19:** <sup>1</sup>H NMR (DMSO-*d*<sub>6</sub>, 400 MHz) of compound 5.1

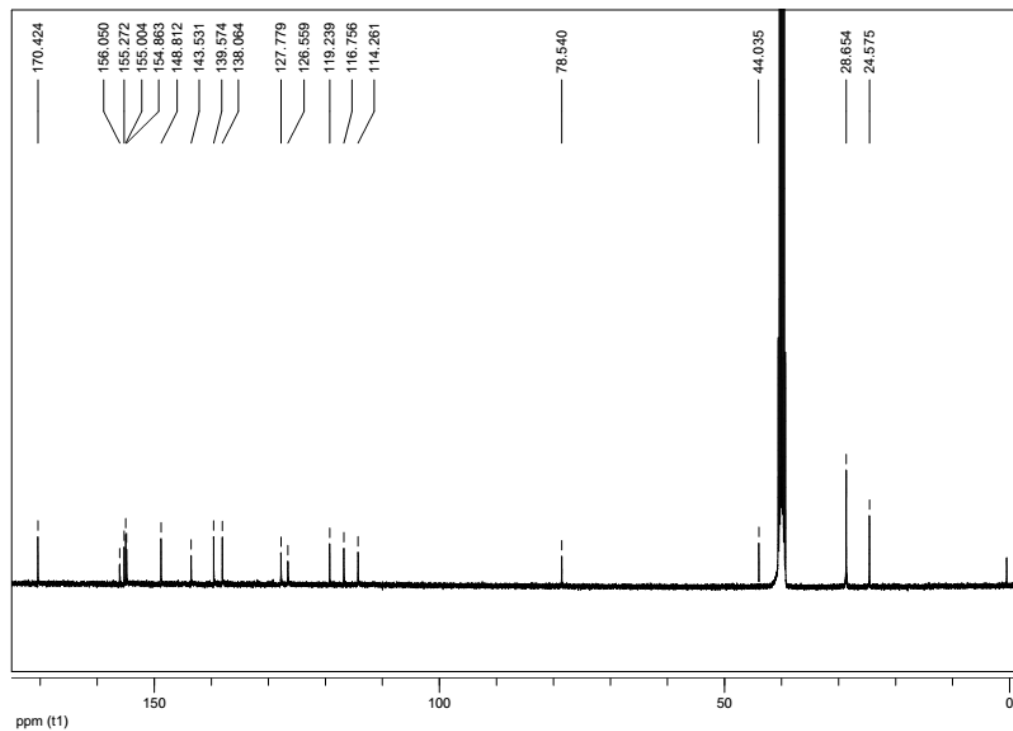

**Figure S20:** <sup>13</sup>C NMR (DMSO-*d*<sub>6</sub>, 100 MHz) of compound 5.1

**Photophysical data and Benesi-Hildebrand association constants of compound 1.1  
(10<sup>-5</sup> M)**

**Table S1:** Numerical photophysical data of **1.1** in MeOH and MeOH/H<sub>2</sub>O at 10<sup>-5</sup>M

| Solvent                       | $\lambda_{\text{abs}}$ , nm | $\lambda_{\text{em}}$ , nm | Relative $\Phi_f$ with respect to quinine sulphate |
|-------------------------------|-----------------------------|----------------------------|----------------------------------------------------|
| MeOH                          | 356, 371                    | 401                        | 0.20                                               |
| MeOH/H <sub>2</sub> O (50:50) | 356, 371                    | 403                        | 0.26                                               |
| MeOH/H <sub>2</sub> O (2:98)  | 356, 371                    | 403                        | 0.25                                               |

**Table S2:** Benesi-Hildebrand association constant for **1.1** with D-fructose.

| IF      | IF-IF <sub>0</sub><br>( $\Delta F$ ) | D-Fructose<br>(mM) | 1/D-Fructose | 1/ $\Delta F$ | K <sub>a</sub><br>104.91 M <sup>-1</sup> | Slope<br>1.6873E-5   |
|---------|--------------------------------------|--------------------|--------------|---------------|------------------------------------------|----------------------|
| 185.489 | 53.750                               | 0.001              | 1000         | 0.0186        |                                          |                      |
| 231.690 | 99.951                               | 0.002              | 500          | 0.010         |                                          |                      |
| 262.329 | 130.590                              | 0.003              | 333.33       | 0.0076        |                                          |                      |
| 289.623 | 157.884                              | 0.004              | 250          | 0.0063        |                                          |                      |
| 311.109 | 179.670                              | 0.005              | 200          | 0.0055        |                                          |                      |
| 348.621 | 216.882                              | 0.006              | 166.66       | 0.0046        |                                          |                      |
| 371.462 | 239.723                              | 0.007              | 142.85       | 0.0041        |                                          |                      |
| 393.968 | 262.229                              | 0.008              | 125          | 0.0038        |                                          |                      |
| 418.180 | 286.441                              | 0.009              | 111.11       | 0.0034        |                                          |                      |
| 433.771 | 302.032                              | 0.10               | 100          | 0.0033        |                                          |                      |
|         |                                      |                    |              |               | IF <sub>0</sub><br>131.739               | Intercept<br>0.00177 |

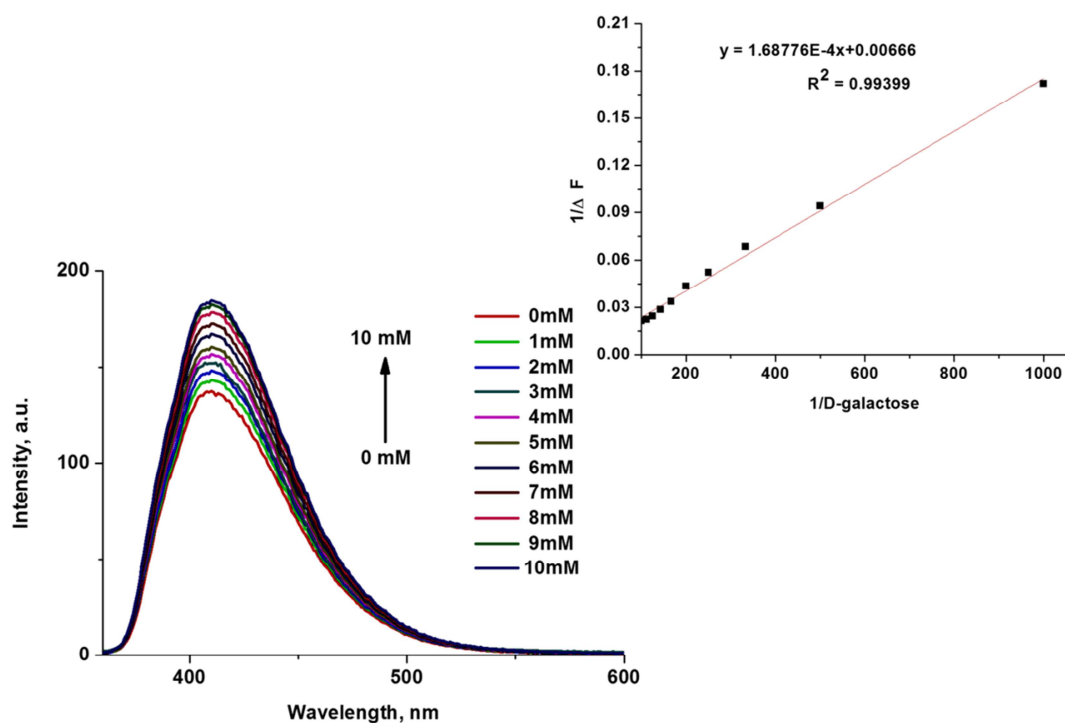

**Figure S21:** Fluorescence spectra of compound **1.1** ( $10^{-5}$  M) in presence of D-galactose at various concentrations (0-10 mM) and inset shows Benesi-Hildebrand plot of the naphthyridine-boronic acid-galactose complex in MeOH/H<sub>2</sub>O (v/v=1:1, 5 mM PBS, pH 8.20) solutions. The monitored emission wavelength was 410 nm.

**Table S3:** Benesi-Hildebrand association constant for **1.1** with D-galactose.

| IF      | IF-IF <sub>0</sub><br>(ΔF) | D-galactose<br>(mM) | 1/D-galactose | 1/ΔF   | K <sub>a</sub><br>39.46 M <sup>-1</sup> | Slope<br>1.68776E-4  |
|---------|----------------------------|---------------------|---------------|--------|-----------------------------------------|----------------------|
| 143.188 | 5.808                      | 0.001               | 1000          | 0.172  |                                         |                      |
| 148.000 | 10.620                     | 0.002               | 500           | 0.0941 |                                         |                      |
| 151.999 | 14.619                     | 0.003               | 333.33        | 0.0684 |                                         |                      |
| 156.438 | 19.058                     | 0.004               | 250           | 0.0524 |                                         |                      |
| 160.275 | 22.895                     | 0.005               | 200           | 0.0436 |                                         |                      |
| 166.896 | 29.516                     | 0.006               | 166.66        | 0.0338 |                                         |                      |
| 172.338 | 34.958                     | 0.007               | 142.85        | 0.0286 |                                         |                      |
| 178.320 | 40.94                      | 0.008               | 125           | 0.0244 |                                         |                      |
| 182.142 | 44.762                     | 0.009               | 111.11        | 0.0223 |                                         |                      |
| 184.326 | 46.946                     | 0.10                | 100           | 0.0213 |                                         |                      |
|         |                            |                     |               |        | IF <sub>0</sub><br>137.38               | Intercept<br>0.00666 |

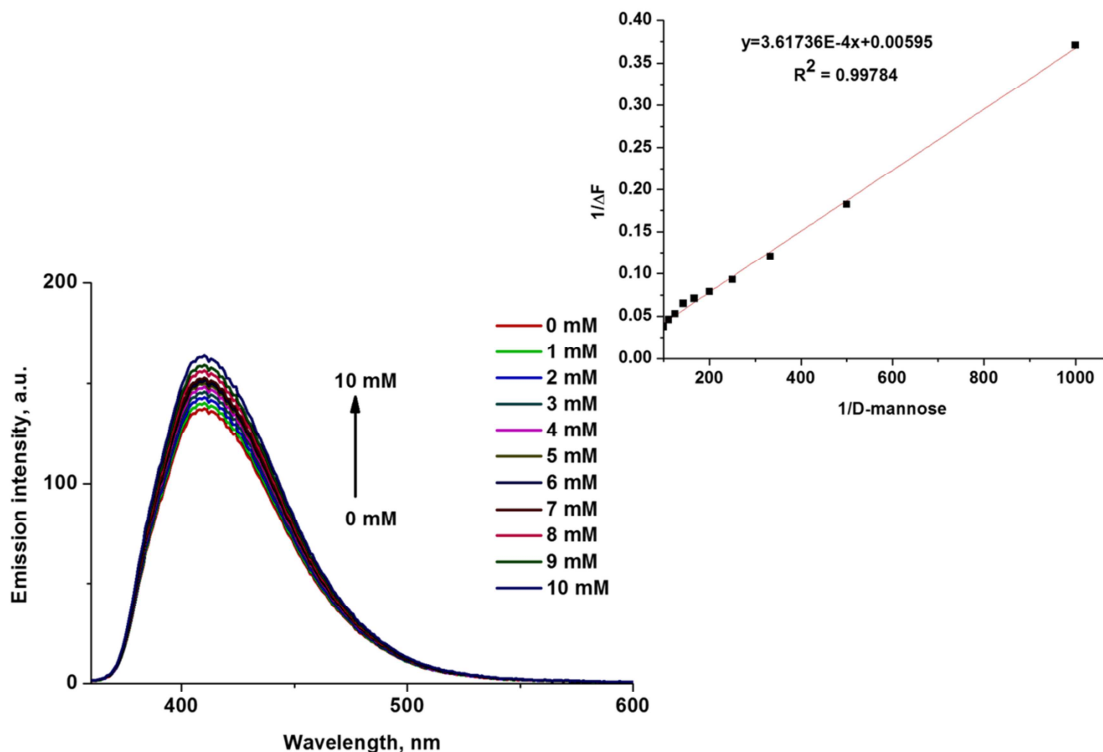

**Figure S22:** Fluorescence spectra of compound **1.1** ( $10^{-5}$  M) in presence of D-mannose at various concentrations (0-10 mM) and inset shows Benesi-Hildebrand plot of the naphthyridine-boronic acid-mannose complex in MeOH/PBS (v/v=1:1, 5 Mm PBS, pH 8.20) solutions. The monitored emission wavelength was 408 nm

**Table S4:** Benesi-Hildebrand association constant for **1.1** with D-mannose.

| IF      | IF-IF <sub>0</sub><br>(ΔF) | D-mannose<br>(mM) | 1/D-<br>mannose | 1/ΔF  | K <sub>a</sub><br>16.44 M <sup>-1</sup> | Slope<br>3.61736E-4  |
|---------|----------------------------|-------------------|-----------------|-------|-----------------------------------------|----------------------|
| 139.565 | 5.808                      | 0.001             | 1000            | 0.371 |                                         |                      |
| 142.364 | 10.620                     | 0.002             | 500             | 0.182 |                                         |                      |
| 145.134 | 14.619                     | 0.003             | 333.33          | 0.121 |                                         |                      |
| 147.620 | 19.058                     | 0.004             | 250             | 0.093 |                                         |                      |
| 149.528 | 22.895                     | 0.005             | 200             | 0.079 |                                         |                      |
| 150.954 | 29.516                     | 0.006             | 166.66          | 0.071 |                                         |                      |
| 152.254 | 34.958                     | 0.007             | 142.85          | 0.065 |                                         |                      |
| 155.730 | 40.94                      | 0.008             | 125             | 0.053 |                                         |                      |
| 158.609 | 44.762                     | 0.009             | 111.11          | 0.046 |                                         |                      |
| 163.180 | 46.946                     | 0.10              | 100             | 0.038 | IF <sub>0</sub><br>136.87               | Intercept<br>0.00595 |

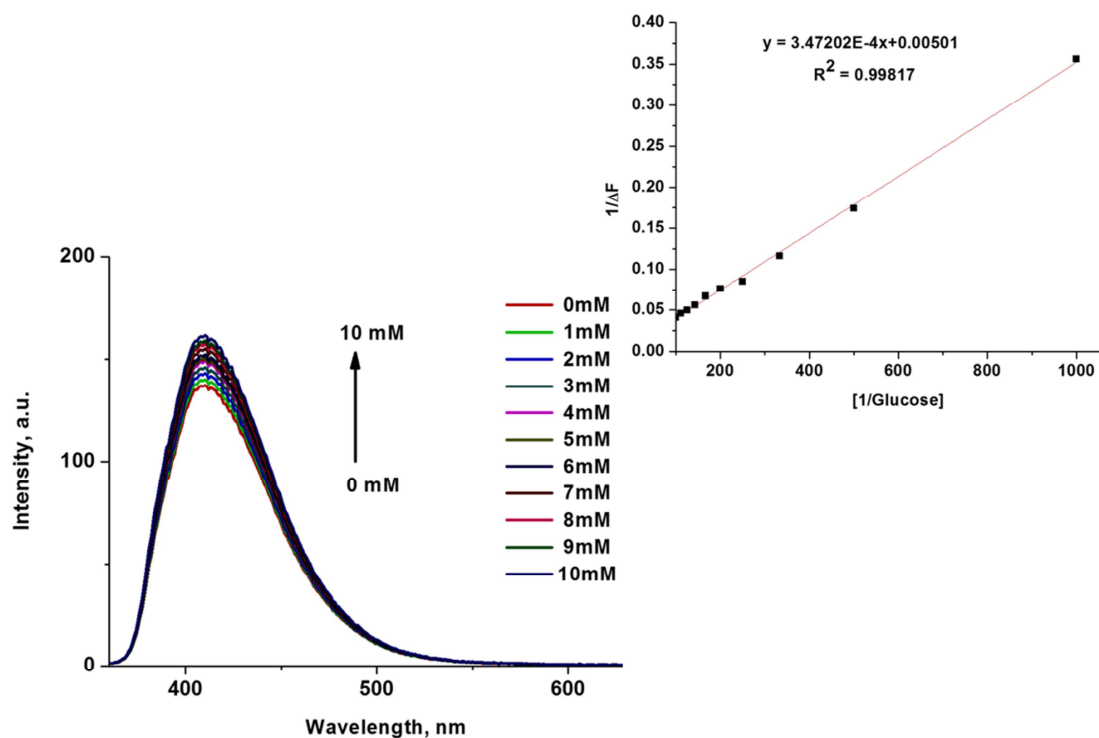

**Figure S23:** Fluorescence spectra of compound **1.1** ( $10^{-5}$  M) in presence of D-glucose at various concentrations (0-10 mM) and inset shows Benesi-Hildebrand plot of the naphthridine-boronic acid-glucose complex in MeOH/H<sub>2</sub>O (v/v=1:1, 5 mM, pH 8.20) solutions. The monitored emission wavelength was 409 nm

**Table S5:** Benesi-Hildebrand association constant for **1.1** with D-glucose.

| IF      | IF-IF <sub>0</sub><br>( $\Delta F$ ) | D-glucose<br>(mM) | 1/D-glucose | 1/ $\Delta F$ | K <sub>a</sub><br>14.42 M <sup>-1</sup> | Slope<br>3.47202E-4  |
|---------|--------------------------------------|-------------------|-------------|---------------|-----------------------------------------|----------------------|
| 139.444 | 2.804                                | 0.001             | 1000        | 0.356         |                                         |                      |
| 142.382 | 5.742                                | 0.002             | 500         | 0.174         | IF <sub>0</sub><br>136.64               | Intercept<br>0.00501 |
| 145.251 | 8.611                                | 0.003             | 333.33      | 0.116         |                                         |                      |
| 148.367 | 11.720                               | 0.004             | 250         | 0.085         |                                         |                      |
| 149.730 | 13.090                               | 0.005             | 200         | 0.076         |                                         |                      |
| 151.371 | 14.731                               | 0.006             | 166.66      | 0.067         |                                         |                      |
| 154.270 | 17.630                               | 0.007             | 142.85      | 0.056         |                                         |                      |
| 156.456 | 19.810                               | 0.008             | 125         | 0.050         |                                         |                      |
| 158.096 | 21.450                               | 0.009             | 111.11      | 0.046         |                                         |                      |
| 160.651 | 24.010                               | 0.10              | 100         | 0.041         |                                         |                      |

## References

- [1] Dempsey, B. *London: Chapman and Hall Ltd* **1974**, 25, 13.
- [2] Chen, H.; Huang, H.; Huang, X.; Clifford, J. N.; Forneli, A.; Palomares, E.; Zheng, X.; Zheng, L.; Wang, X.; Shen, P.; Zhao, B.; Tan, S. *J. Phys. Chem. C* **2010**, 114, 3280.
- [3] Shen, P.; Tang, Y.; Jiang, S.; Chen, H.; Zheng, X.; Wang, X.; Zhao, B.; Tan, S. *Org. Electron.* **2011**, 12, 125.
- [4] Pyun, S. Y.; Lee, D. C.; Seung, Y. J.; Cho, B. R. *J. Org. Chem.* **2005**, 70, 5327.
- [5] Putey, A.; Joucla, L.; Picot, L.; Besson, T.; Joseph, B. *Tetrahedron* **2007**, 63, 867.
- [6] Palamà, I.; Di Maria, F.; Viola, I.; Fabiano, E.; Gigli, G.; Bettini, C.; Barbarella, G. *J. Am. Chem. Soc.* **2011**, 133, 17777.
- [7] Mita, T.; Higuchi, Y.; Sato, Y. *Org. Lett.* **2011**, 13, 2354.
